# Supplementary material for: Ultrasensitive H2S gas sensors based on p-type WS2 hybrid materials
Source: Springer Nature journal article supplement (doi:10.1007/s12274-018-2009-9), 2018-02-20
Supplement: MOESM1 [file 12274_2018_2009_MOESM1_ESM.pdf]

## Electronic Supplementary Material

# Ultrasensitive H<sub>2</sub>S gas sensors based on p-type WS<sub>2</sub> hybrid materials

Georgies Alene Asres<sup>1</sup>, José J. Baldoví<sup>2,3</sup>, Aron Dombovari<sup>1</sup>, Topias Järvinen<sup>1</sup>, Gabriela Simone Lorite<sup>1</sup>, Melinda Mohl<sup>1</sup>, Andrey Shchukarev<sup>4</sup>, Alejandro Pérez Paz<sup>3,5</sup>, Lede Xian<sup>2,3</sup>, Jyri-Pekka Mikkola<sup>4,6</sup>, Anita Lloyd Spetz<sup>1,7</sup>, Heli Jantunen<sup>1</sup>, Ángel Rubio<sup>2,3</sup> (✉), and Krisztian Kordas<sup>1</sup> (✉)

<sup>1</sup> Microelectronics Research Unit, Faculty of Information Technology and Electrical Engineering, University of Oulu, P.O. Box 4500, FI-90014 Oulu, Finland

<sup>2</sup> Max Planck Institute for the Structure and Dynamics of Matter, Luruper Chaussee 149, 22761 Hamburg, Germany

<sup>3</sup> Nano-Bio Spectroscopy Group, European Theoretical Spectroscopy Facility (ETSF), Universidad del País Vasco, CFM SCIC-UPV/EHU-MPC DIPC, Avenida Tolosa 72, 20018 San Sebastian, Spain

<sup>4</sup> Technical Chemistry, Department of Chemistry, Chemical-Biological Centre, Umeå University, SE-90187 Umeå, Sweden

<sup>5</sup> School of Chemical Sciences and Engineering, School of Physics and Nanotechnology, Yachay Tech University, Urququí, Ecuador

<sup>6</sup> Industrial Chemistry & Reaction Engineering, Department of Chemical Engineering, Johan Gadolin Process Chemistry Centre, Åbo Akademi University, FI-20500 Åbo-Turku, Finland

<sup>7</sup> Sensor and Actuator Systems, Department of Physics, Chemistry and Biology, Linköping University, SE-58183 Linköping, Sweden

Supporting information to <https://doi.org/10.1007/s12274-018-2009-9>

### Resistive and field-effect transistor H<sub>2</sub>S sensors

**Table S1** Resistive and field-effect transistor H<sub>2</sub>S sensors and their properties reported in the literature

| Method    | Sensing material                                                 | Sensitivity <sup>a</sup> | Operating temperature | Lowest experimental H <sub>2</sub> S concentration <sup>b</sup> | Ref.      |
|-----------|------------------------------------------------------------------|--------------------------|-----------------------|-----------------------------------------------------------------|-----------|
| Resistive | WS <sub>2</sub> nanowire-nanoflake hybrid                        | 0.043 ppm <sup>-1</sup>  | 200 °C                | 0.02 ppm                                                        | This work |
| Resistive | α-Fe <sub>2</sub> O <sub>3</sub> nanoparticles                   | ~5.2 ppm <sup>-1</sup>   | 300 °C                | 0.05 ppm                                                        | [1]       |
| Resistive | CuO nanosheets                                                   | ~3.3 ppm <sup>-1</sup>   | 240 °C                | 0.03 ppm                                                        | [2]       |
| Resistive | Mesoporous WO <sub>3</sub>                                       | ~50 ppm <sup>-1</sup>    | 250 °C                | 0.25 ppm                                                        | [3]       |
| Resistive | CeO <sub>2</sub> nanowire                                        | ~2 ppm <sup>-1</sup>     | Room temp.            | 0.05 ppm                                                        | [4]       |
| Resistive | PbS quantum dots                                                 | ~140 ppm <sup>-1</sup>   | 135 °C                | 10 ppm                                                          | [5]       |
| Resistive | ZnO nanostructures                                               | ~0.14 ppm <sup>-1</sup>  | 300 °C                | 20 ppm                                                          | [6]       |
| Resistive | Pt-loaded WO <sub>3</sub> thin films                             | ~1200 ppm <sup>-1</sup>  | 100 °C                | 1 ppm                                                           | [7]       |
| Resistive | Nanocrystalline In <sub>2</sub> O <sub>3</sub> -SnO <sub>2</sub> | ~20 ppm <sup>-1</sup>    | 40 °C                 | 2 ppm                                                           | [8]       |
| Resistive | SnO <sub>2</sub> thin film                                       | 0.2 ppm <sup>-1</sup>    | 300 °C                | 5 ppm                                                           | [9]       |
| Resistive | SnO <sub>2</sub> nanocolumns                                     | 2.8 ppm <sup>-1</sup>    | 300 °C                | 5 ppm                                                           | [9]       |
| Resistive | SnO <sub>2</sub> nanocolumns decorated with Au                   | 22 ppm <sup>-1</sup>     | 300 °C                | 5 ppm                                                           | [9]       |
| Resistive | SnO <sub>2</sub> nanocolumns decorated with Ag                   | 12.8 ppm <sup>-1</sup>   | 300 °C                | 5 ppm                                                           | [9]       |
| FET       | Ultrathin Ph5T2 microplates                                      | 240 ppm <sup>-1</sup>    | Room temp.            | 0.5 ppm                                                         | [10]      |
| FET       | CuPc                                                             | 0.004 ppm <sup>-1</sup>  | Room temp.            | 100 ppm                                                         | [11]      |
| FET       | In <sub>2</sub> O <sub>3</sub> nanowires                         | 0.41 ppm <sup>-1</sup>   | Room temp.            | 1 ppm                                                           | [12]      |

<sup>a</sup> The highest sensitivity values are calculated from the published references as the relative change of electrical resistance normalized to the corresponding H<sub>2</sub>S concentration i.e.  $\Delta R/(R_0 \cdot C_{H_2S})$ . When the electrical current values were reported, the sensitivity values were calculated from the relative change of the current at the corresponding gas concentration, i.e.  $\Delta I/(I_0 \cdot C_{H_2S})$ .

Address correspondence to Krisztian Kordas, [krisztian.kordas@oulu.fi](mailto:krisztian.kordas@oulu.fi); Angel Rubio, [angel.rubio@mpsd.mpg.de](mailto:angel.rubio@mpsd.mpg.de)

## Theoretical calculations

### Adsorption energy and equilibrium height

For the study of the adsorption of H<sub>2</sub>S upon WS<sub>2</sub> monolayer, we considered four adsorption sites: the center of a hexagon (H), the center of a W–S bond (B), the top of a W atom (TW) and the top of a S atom (TS) (Figure S1). For each anchoring site we investigated three possible orientations of the H<sub>2</sub>S molecule, namely *up* (the H atoms pointing away from the surface), *down* (the H atoms pointing towards the slab) and *par* (the bonds H–S parallel to the monolayer).

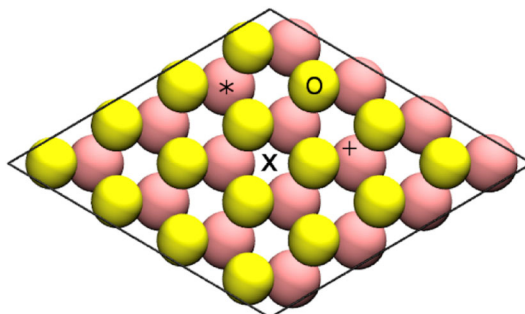

**Figure S1** 4x4 supercell of the relaxed pristine monolayer WS<sub>2</sub>. The four adsorption sites are labelled as H (X), B (+), TW (\*) and TS (o).

For each geometrical optimization of the system (supercell+molecule) we calculated the total energy. The total energies of the H<sub>2</sub>S molecule and the clean slab supercell using the same unit cell were -310.05 and -38668.53 eV respectively. The calculated adsorption energy ( $E_{ads}$ ) and the equilibrium height ( $h$ ) for each case are reported in Table S2.

**Table S2** Calculated adsorption energy ( $E_{ads}$ ) and equilibrium height for the different adsorption sites of H<sub>2</sub>S molecule on pristine WS<sub>2</sub> monolayer.

|             | $E_{ads}$ / meV | $h$ / Å |
|-------------|-----------------|---------|
| $H_{up}$    | -156.509        | 3.33    |
| $H_{down}$  | <b>-181.365</b> | 2.55    |
| $H_{par}$   | -177.500        | 2.66    |
| $B_{up}$    | -172.414        | 2.97    |
| $B_{down}$  | -169.677        | 2.59    |
| $B_{par}$   | -150.301        | 2.72    |
| $TW_{up}$   | -153.173        | 3.36    |
| $TW_{down}$ | <b>-181.106</b> | 2.56    |
| $TW_{par}$  | -172.040        | 2.62    |
| $TS_{up}$   | -109.107        | 3.63    |
| $TS_{down}$ | -146.507        | 2.79    |
| $TS_{par}$  | -164.308        | 2.76    |

As can be observed in Table S2 there are two anchoring positions that show a more marked stability. These are the H and TW sites with adsorption energy of  $\sim -181$  meV. However, we could not appreciate significant differences between the determined electronic structures in both more stable sites, which allowed us to perform all the calculations from the H anchoring position in order to simulate the interaction of H<sub>2</sub>S with the hybrid

material. Subsequently, we have structurally optimized the adsorption of  $H_2$ , CO, NO and  $NH_3$  upon the  $WS_2$  supercell. As a starting point, we placed the gas molecules in the most stable orientation determined using LDA [13], i.e. TW, H, B and H respectively. The most favorable configurations according to our results are reported in Figures S2-S5.

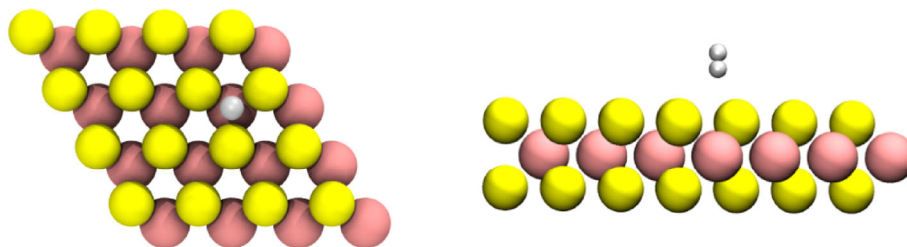

**Figure S2** Relaxed geometries for  $H_2$  adsorbed on pristine monolayer  $WS_2$ . (left) Top and (right) side view of the most favorable DFT/PBE-D2 relaxed geometries for  $H_2$  adsorbed on pristine monolayer  $WS_2$ . The S, W and H atoms are depicted by the yellow, pink and white spheres, respectively.

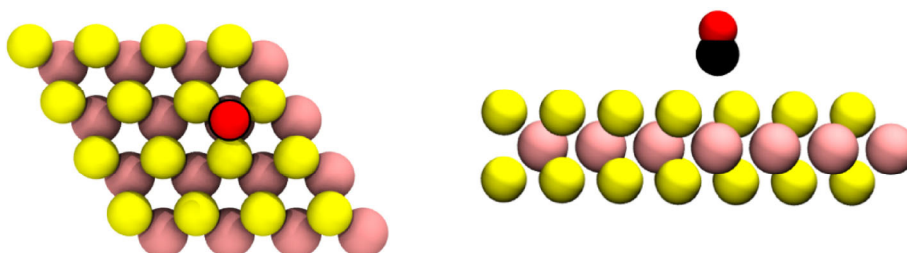

**Figure S3** Relaxed geometries for CO adsorbed on pristine monolayer  $WS_2$ . (left) Top and (right) side view of the most favorable DFT/PBE-D2 relaxed geometries for CO adsorbed on pristine monolayer  $WS_2$ . The S, W, C and O atoms are depicted by the yellow, pink, black and red spheres, respectively.

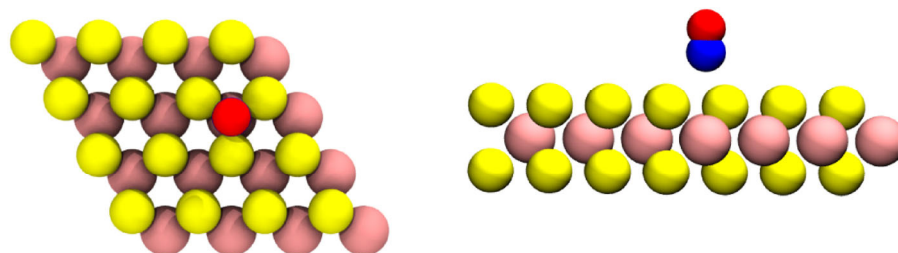

**Figure S4** Relaxed geometries for NO adsorbed on pristine monolayer  $WS_2$ . (left) Top and (right) side view of the most favorable DFT/PBE-D2 relaxed geometries for NO adsorbed on pristine monolayer  $WS_2$ . The S, W, N and O atoms are depicted by the yellow, pink, blue and red spheres, respectively.

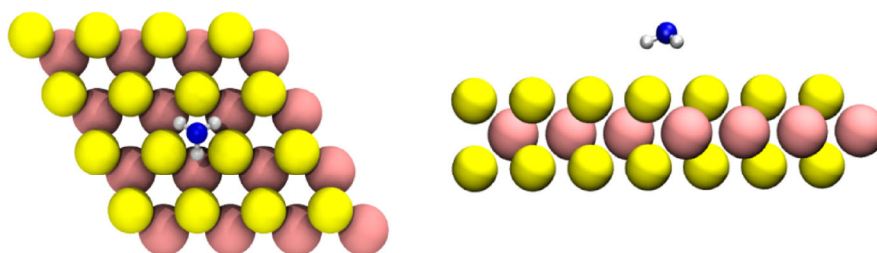

**Figure S5** Relaxed geometries for  $NH_3$  adsorbed on pristine monolayer  $WS_2$ . (left) Top and (right) side view of the most favorable DFT/PBE-D2 relaxed geometries for  $NH_3$  adsorbed on pristine monolayer  $WS_2$ . The S, W, N and H atoms are depicted by the yellow, pink, blue and white spheres, respectively.

The adsorption energies are -57.4 meV ( $\text{H}_2$ ), -84.7 meV ( $\text{CO}$ ), -509.3 meV ( $\text{NO}$ ) and -171.7 meV ( $\text{NH}_3$ ). The calculated  $E_{ads}$  are in good qualitative agreement with the ones calculated within LDA: -75 meV ( $\text{H}_2$ ), -127 meV ( $\text{CO}$ ), -206 meV ( $\text{NO}$ ) and -216 meV ( $\text{NH}_3$ ) [13]. The exception is the case of  $\text{NO}$ , which we properly describe using spin-polarized calculations, whereas LDA results for  $\text{NO}$  [13] were incorrectly calculated at the spin-paired level. On the other hand, if we compare quantitatively, one can observe the smaller binding energy for all the studied gases determined within GGA+vdW, which is consistent with the general trend towards underbinding (overbinding) typical of GGA(LDA) [14].

### Electronic structure

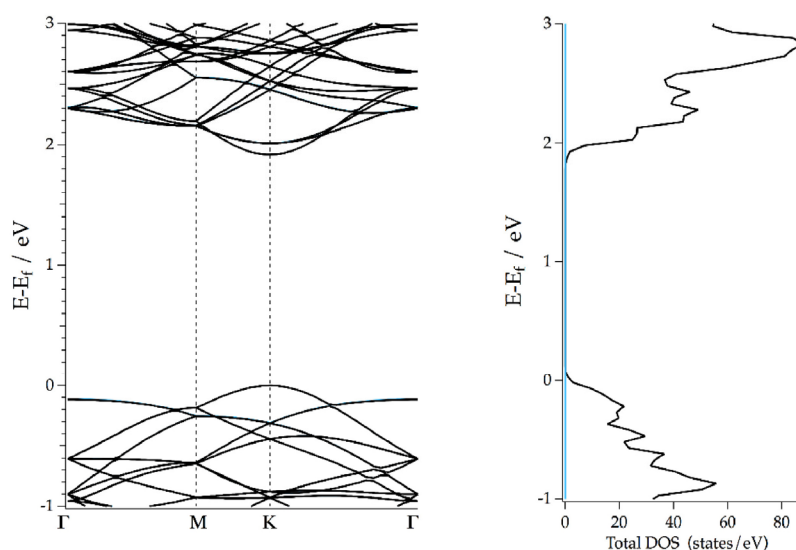

**Figure S6** Calculated electronic band structure and density of states of  $\text{H}_2$  adsorbed on monolayer  $\text{WS}_2$ . The sky blue line represent the projection of the local density of states of the  $\text{H}_2$  gas molecule.

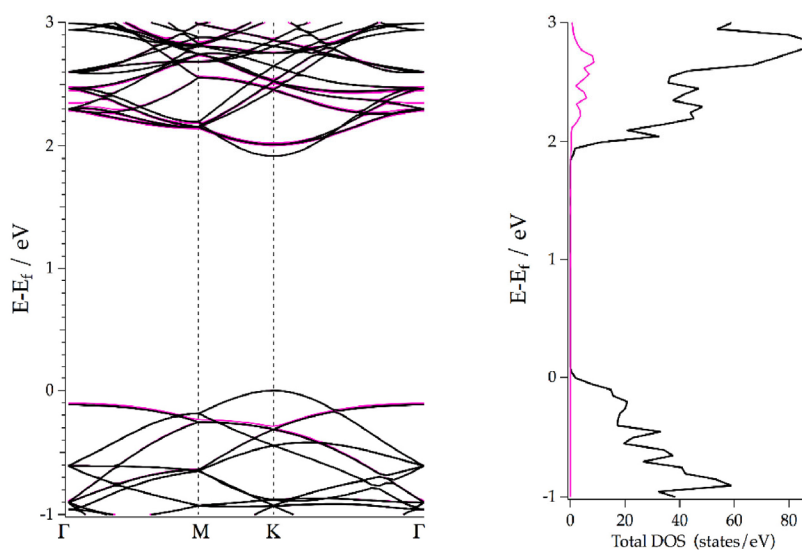

**Figure S7** Calculated electronic band structure and density of states of  $\text{CO}$  adsorbed on monolayer  $\text{WS}_2$ . The pink line represent the projection of the local density of states of the  $\text{CO}$  gas molecule.

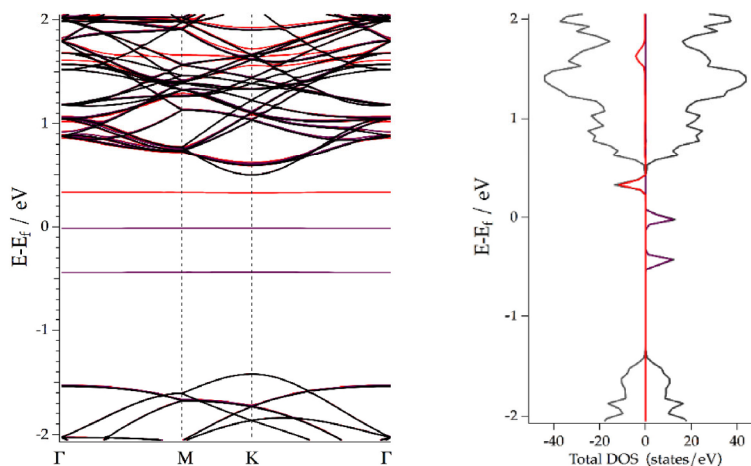

**Figure S8** Calculated electronic band structure and density of states of NO adsorbed on monolayer WS<sub>2</sub>. The red (spin up) and purple (spin down) lines represent the projection of the local density of states of the NO gas molecule.

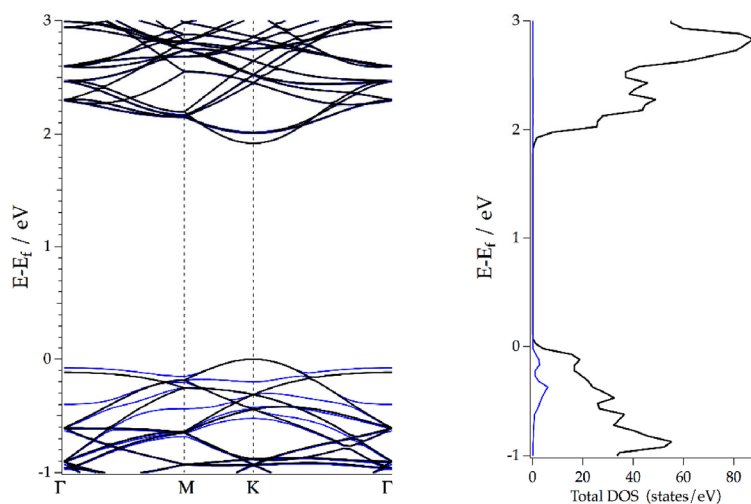

**Figure S9** Calculated electronic band structure and density of states of NH<sub>3</sub> adsorbed on monolayer WS<sub>2</sub>. The blue line represent the projection of the local density of states of the NH<sub>3</sub> gas molecule.

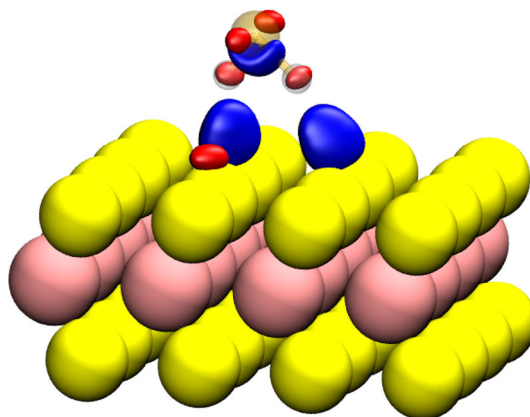

**Figure S10** Valence electronic density differential plot with an isosurface value of 0.0004 e/Bohr<sup>3</sup>. Blue (red) depicts electron accumulation (depletion) regions, respectively. Reorganization of the electronic density in H<sub>2</sub>S molecule upon adsorption and electron accumulation at the interface are visible. However, this density redistribution is small in absolute terms and moreover Bader charge analysis predicts no net electron transfer between H<sub>2</sub>S and WS<sub>2</sub> slab.

**Table S3** Comparison of the calculated charge transfer from PBE-D2 and LDA for the different gas species adsorbed on pristine monolayer WS<sub>2</sub>. Positive values mean transfer from WS<sub>2</sub> to adsorbate."

| Gas                        | GGA - This work | LDA [13] |
|----------------------------|-----------------|----------|
| H <sub>2</sub>             | 0.004           | 0.002    |
| CO                         | 0.003           | 0.022    |
| NO                         | 0.008           | 0.018    |
| NH <sub>3</sub>            | -0.017          | -0.061   |
| H <sub>2</sub> S           | 0.005           | –        |
| H <sub>2</sub> S (bilayer) | 0.002           | –        |

## References

- [1] Li, Z.; Huang, Y.; Zhang, S.; Chen, W.; Kuang, Z.; Ao, D.; Liu, W.; Fu, Y. A fast response & recovery H<sub>2</sub>S gas sensor based on  $\alpha$ -Fe<sub>2</sub>O<sub>3</sub> nanoparticles with ppb level detection limit. *J. Hazard. Mater.* **2015**, *300*, 167-174.
- [2] Zhang, F.; Zhu, A.; Luo, Y.; Tian, Y.; Yang, J.; Qin, Y. CuO nanosheets for sensitive and selective determination of H<sub>2</sub>S with high recovery ability. *J. Phys. Chem. C*, **2010**, *114*, 19214-19219.
- [3] Li, Y.; Luo, W.; Qin, N.; Dong, J.; Wei, J.; Li, W.; Feng, S.; Chen, J.; Xu, J.; Elzatahry, A.A.; Es-Saheb, M.H.; Deng, Y.; Zhao, D. Highly ordered mesoporous tungsten oxides with a large pore size and crystalline framework for H<sub>2</sub>S sensing. *Angew. Chem.* **2014**, *53*, 9035-9040.
- [4] Li, Z.; Niu, X.; Lin, Z.; Wang, N.; Shen, H.; Liu, W.; Sun, K.; Fu, Y.Q.; Wang, Z. Hydrothermally synthesized CeO<sub>2</sub> nanowires for H<sub>2</sub>S sensing at room temperature. *J. Alloy. Comp.*, **2016**, *682*, 647-653.
- [5] Li, M.; Zhou, D.; Zhao, J.; Zheng, Z.; He, J.; Hu, L.; Xia, Z.; Tang, J.; Liu, H. Resistive gas sensors based on colloidal quantum dot (CQD) solids for hydrogen sulfide detection. *Sens. Actuat. B*, **2015**, *217*, 198-201.
- [6] Mortezaali, A.; Moradi, R. The correlation between the substrate temperature and morphological ZnO nanostructures for H<sub>2</sub>S gas sensors. *Sens. Actuat. A*, **2014**, *206*, 30-34.
- [7] Shen, Y.; Zhang, B.; Cao, X.; Wei, D.; Ma, J.; Jia, L.; Gao, S.; Cui, B.; Jin, Y. Microstructure and enhanced H<sub>2</sub>S sensing properties of Pt-loaded WO<sub>3</sub> thin films. *Sens. Actuat. B*, **2014**, *193*, 273-279.
- [8] Liu, H.; Wu, S.; Gong, S.; Zhao, J.; Liu, J.; Zhou, D. Nanocrystalline In<sub>2</sub>O<sub>3</sub>-SnO<sub>2</sub> thick films for low-temperature hydrogen sulfide detection. *Ceram. Int.*, **2011**, *37*, 1889-1894.
- [9] Yoo, K. S.; Han, S. D.; Moon, H. G.; Yoon, S. J.; Kang, C. Y. Highly sensitive H<sub>2</sub>S sensor based on the metal-catalyzed SnO<sub>2</sub> nanocolumns fabricated by glancing angle deposition. *Sens.* **2015**, *15*, 15468-15477.
- [10] Zhao, X.; Tong, Y.; Tang, Q.; Tian, H.; Liu, Y. Highly sensitive H<sub>2</sub>S sensors based on ultrathin organic single-crystal microplate transistors. *Org. Electron.*, **2016**, *32*, 94-99.
- [11] Li, X.; Jiang, Y.; Xie, G.; Tai, H.; Sun, P.; Zhang, B. Copper phthalocyanine thin film transistors for hydrogen sulfide detection. *Sens. Actuat. B* **2013**, *176*, 1191-1196.
- [12] Zeng, Z.; Wang, K.; Zhang, Z.; Chen, J.; Zhou, W. The detection of H<sub>2</sub>S at room temperature by using individual indium oxide nanowire transistors, *Nanotechnol.* **2009**, *20*, 045503.
- [13] Zhou, C.; Yang, W.; Zhu, H.; Mechanism of charge transfer and its impacts on Fermi-level pinning for gas molecules adsorbed on monolayer WS<sub>2</sub>. *J. Chem. Phys.*, **2015**, *142*, 214704.
- [14] Simeoni, M.; Picozzi, S.; Delley, B. An ab-initio study of pentacene on aluminum (100) surface. *Surf. Sci.* **2004**, *562*, 43-52.
